# Supplementary material for: Sox6 expression distinguishes dorsally and ventrally biased dopamine neurons in the substantia nigra with distinctive properties and embryonic origins
Source: PubMed Central journal article supplement — Cell Rep. Author manuscript; Available in PMC 2021 Nov 22. (PMC8607753; doi:10.1016/j.celrep.2021.109975), 2021-11-09
Supplement: NIHMS1756253-supplement-1.pdf [file NIHMS1756253-supplement-1.pdf]

**Supplemental information**

**Sox6 expression distinguishes dorsally and ventrally  
biased dopamine neurons in the substantia nigra  
with distinctive properties and embryonic origins**

**Milagros Pereira Luppi, Maite Azcorra, Giuliana Caronia-Brown, Jean-Francois Poulin, Zachary Gaertner, Serafin Gatica, Oscar Andrés Moreno-Ramos, Navid Nouri, Marilyn Dubois, Yongchao C. Ma, Charu Ramakrishnan, Lief Fenno, Yoon Seok Kim, Karl Deisseroth, Francesca Cicchetti, Daniel A. Dombeck, and Rajeshwar Awatramani**

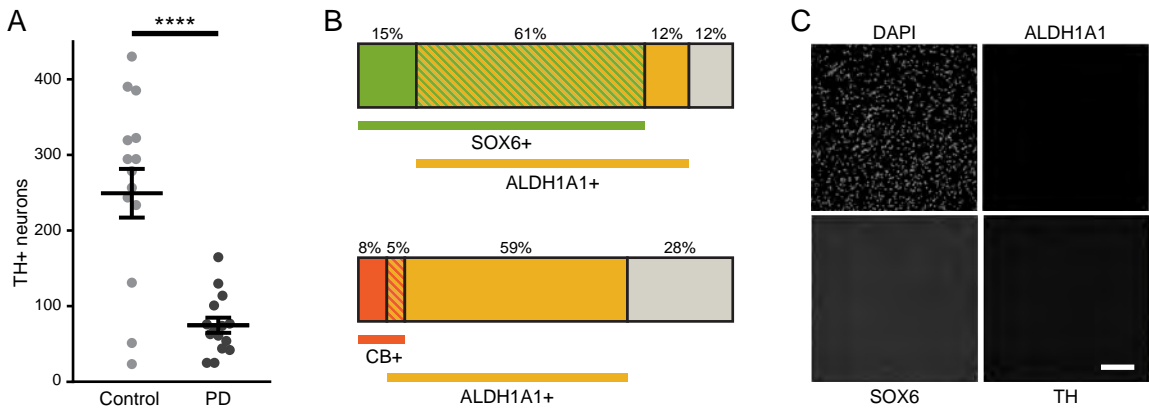

**Fig. S1 (Related to Figure 1): Vulnerability and markers of DA neurons in hSNc.**

**A)** Quantification of TH+ neurons in control and PD brains ( $p = 1.89 \times 10^{-5}$ ,  $n=14$  controls,  $n=15$  PD). **B)** Percentage of SOX6+ and ALDH1A1+, and CALBINDIN-D28k+ (CB+) and ALDH1A1+ DA neurons in control brains. **C)** Primary antibody negative controls. Error bars are SEM. Scale bar: 200  $\mu\text{m}$ .

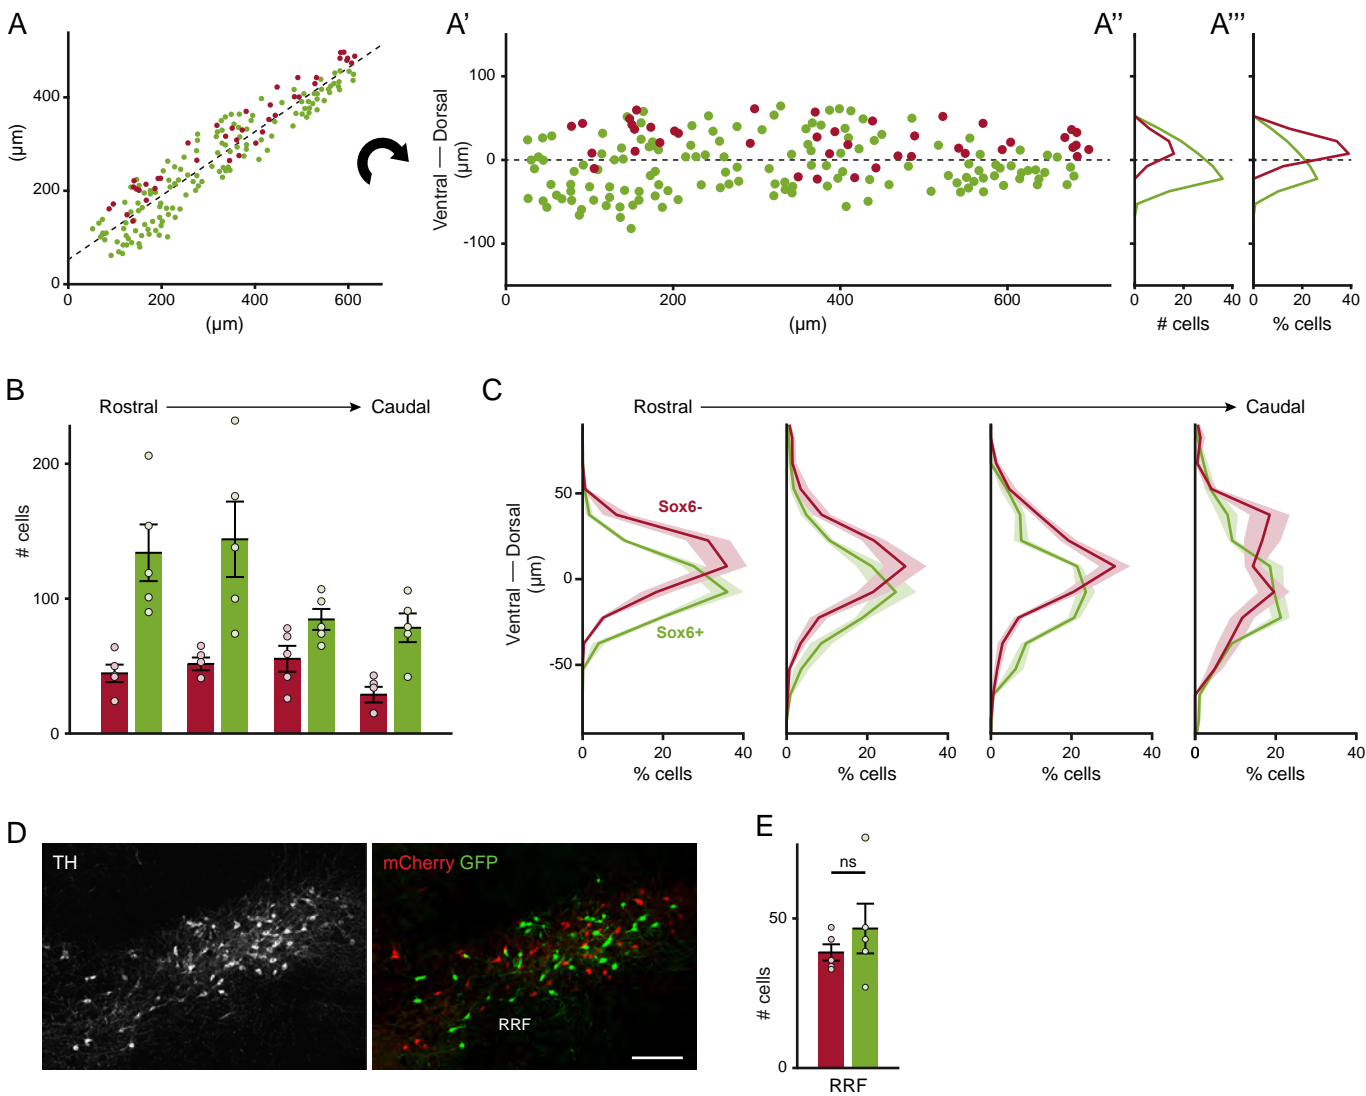

**Figure S2 (Related to Figure 2): *Sox6*<sup>+</sup> and *Sox6*<sup>-</sup> neurons distribution across the rostrocaudal axis.**

**A)** Example of methodology used for obtaining dorso-ventral histograms in Fig. 2D,E and Fig. S2C. Coordinates are obtained for SNc Th+GFP<sup>+</sup> and Th+mCherry<sup>+</sup> cells. A line of best fit is obtained for all cells, which is used to set the center of the SNc. Cell coordinates are then rotated along this line (A'), and a histogram of cells is obtained, perpendicular to the center line (A''). For Fig 2E, S2C, cell counts are then normalized (A'''). **B)** Average number of GFP<sup>+</sup> (green) and mCherry<sup>+</sup> (red) neurons per SNc section level; GFP<sup>+</sup> cells are more abundant than mCherry<sup>+</sup> cells at all SNc section levels (n=5). **C)** Spatial distribution of GFP<sup>+</sup> and mCherry<sup>+</sup> neurons per SNc section level. mCherry<sup>+</sup> neurons are biased dorsally at all rostro-caudal levels (n=5). **D)** In the RRF of *Sox6*-FSF-Cre, Th-2A-Flpo, RC-Frepe brains, GFP<sup>+</sup> and mCherry<sup>+</sup> cells are evenly distributed. **E)** Average numbers of GFP<sup>+</sup> (green bars) and mCherry<sup>+</sup> (red bars) cells in the RRF (n=5). Error bars (B, E) and shaded area (C) are SEM. Scale bar = 200 µm. RRF: retrorubral field.

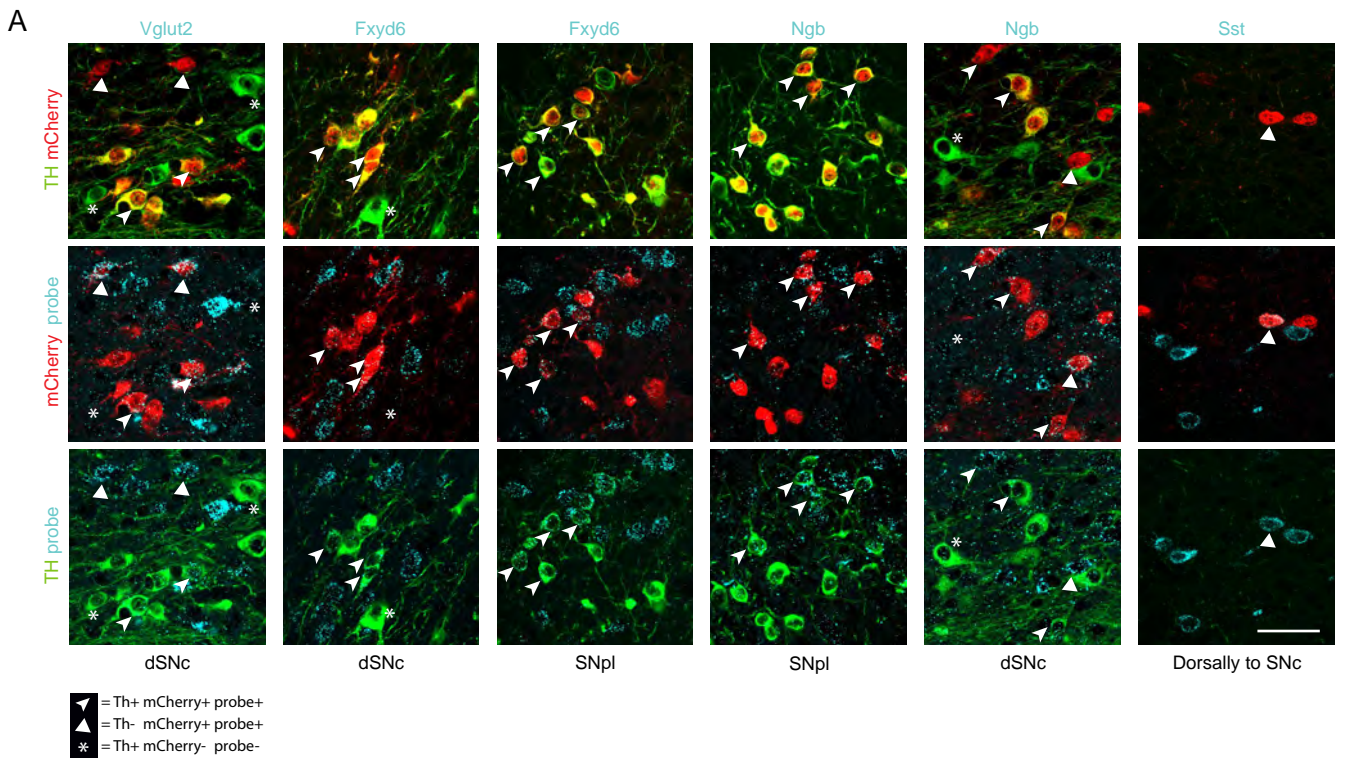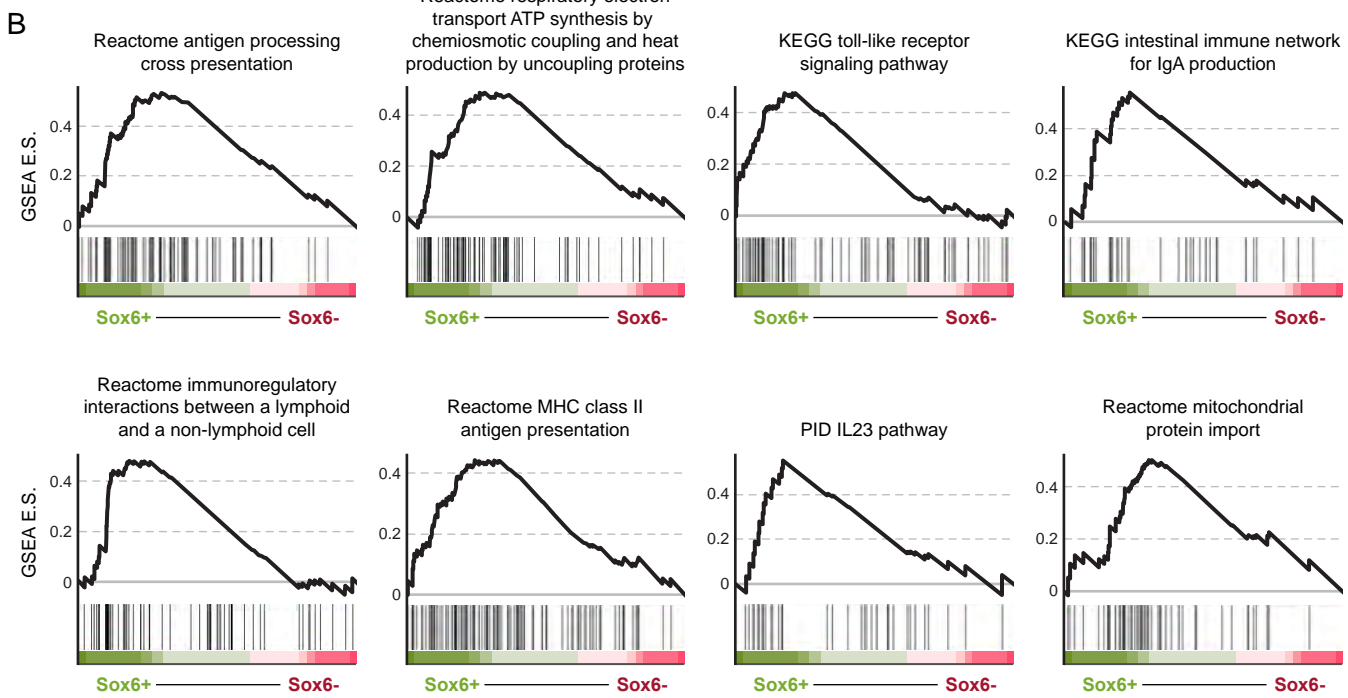

**Fig. S3 (Related to Figure 3):** Genes enriched in the *Sox6*- and *Sox6*+ population by in situ hybridization and GSEA, respectively.

**A)** RNAscope in situ hybridization of genes differentially expressed in mCherry+ neurons combined with immunofluorescence of TH and mCherry. *Vglut2* is expressed in mCherry+,TH+ (arrowheads) and mCherry+,TH- neurons (triangles), although we observed a basal nuclear expression in most cells (asterisk, fewer than 10 dots). In the SNpl and dorsal SNc (dSNc), *Fxyd6* and *Ngb* are expressed in mCherry+,TH+ neurons (arrowheads) and in mCherry+,TH- (triangles), but not in mCherry-TH+ neurons (asterisk). *Sst* was observed only in mCherry+,TH- neurons above the SNc. Scale bar is 50  $\mu$ m.

**B)** GSEA Plots of significantly enriched gene sets in the *Sox6*+ population (q-value < 0.05). Plots are shown in increasing order of q. E.S.: Enrichment Score.

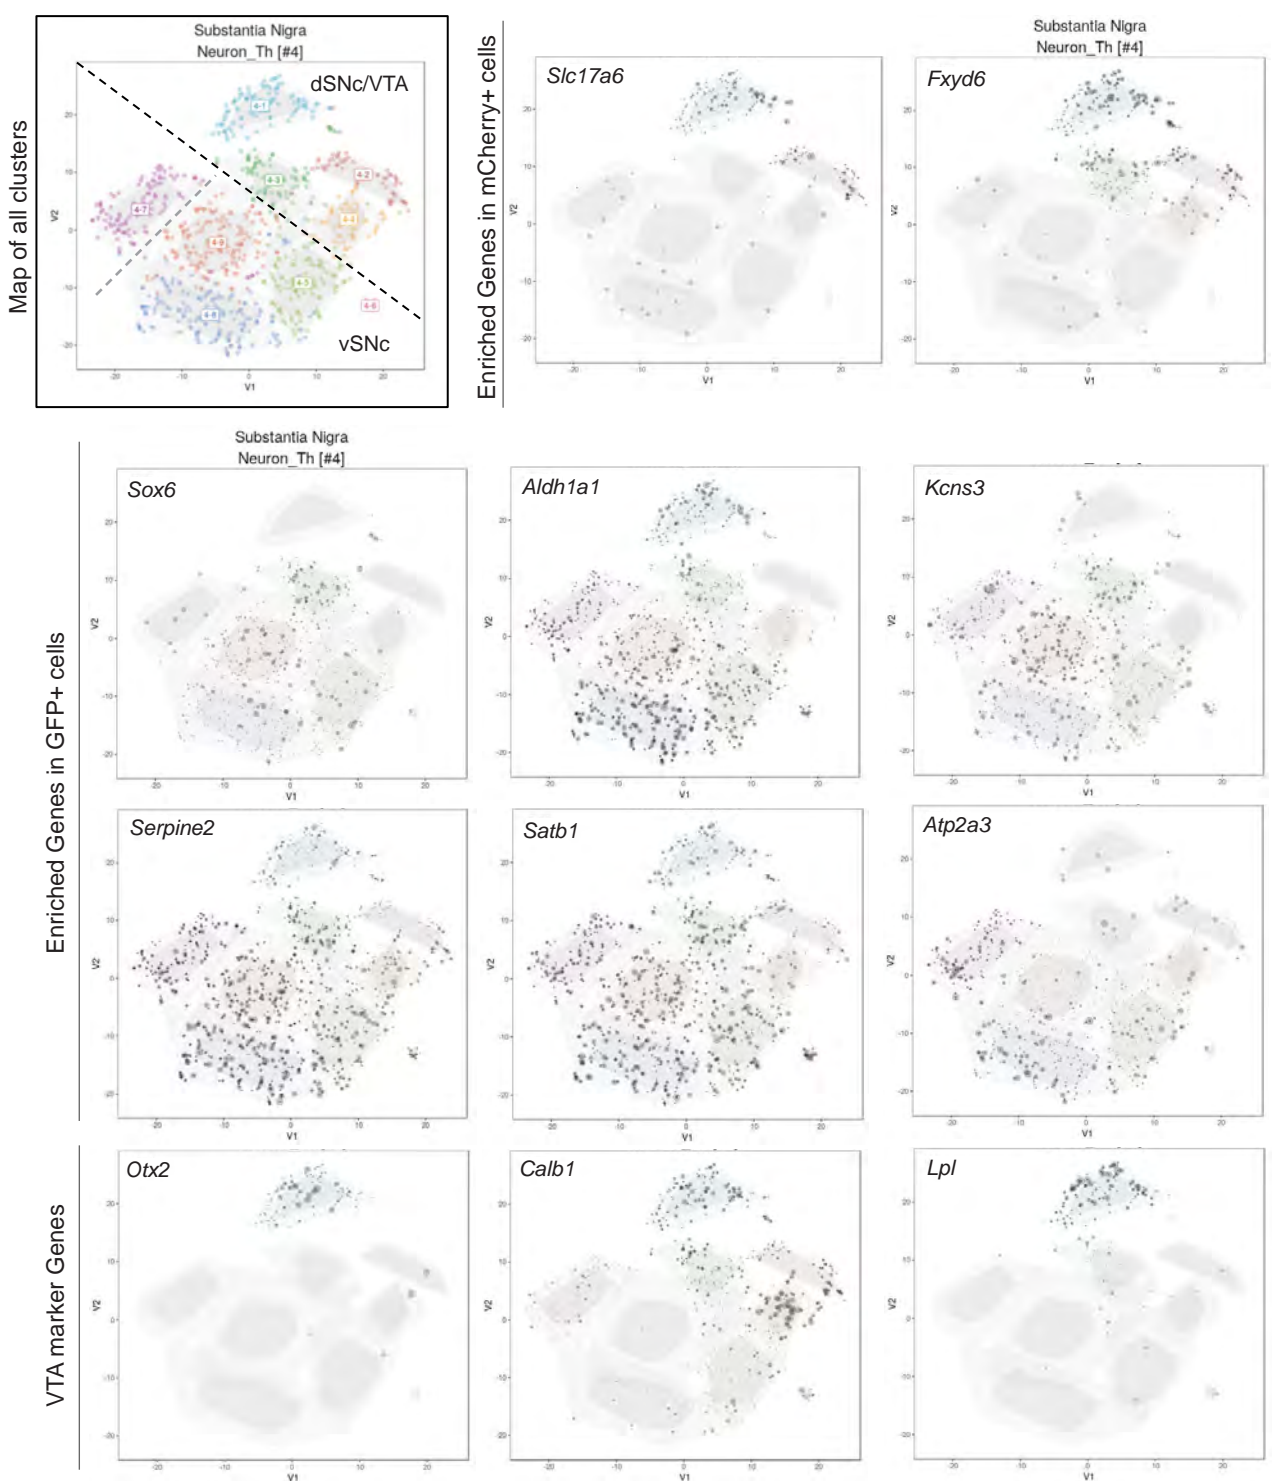

**Fig. S4 (Related to Figure 3): DropViz plots of differentially expressed genes in Sox6+ and Sox6- SNc neurons, and VTA.**

DropViz visualization of genes of interest within the preset “Substantia Nigra Neuron\_Th #4” population. The reference panel on the top left indicates our proposed ventral SNc (vSNc) and dSNc/VTA clusters. vSNc clusters (4-5, 4-6, 4-8, 4-9) show expression of *Sox6*, *Aldh1a1*, *Kcns3*, *Satb1*, *Serpine2* and *Atp2a3*. dSNc/VTA clusters (4-1, 4-2, 4-3, 4-4) express *Slc17a6* (*Vglut2*), *Fxyd6* and *Calb1* but only 4-1 shows *Otx2* and *Lpl*, VTA markers. Thus, 4-1 appears to represent the ventromedial VTA. Cluster 4-3 is *Calb1*+ and *Sox6*+, thus, it could represent parabrachial VTA since the latter includes *Sox6*+ neurons. 4-2 is *Calb1*+, *Vglut2*+, *Fxyd6*+, *Sox6*-, and thus likely represents the SNpl neurons. We were unable to disambiguate cluster 4-7.

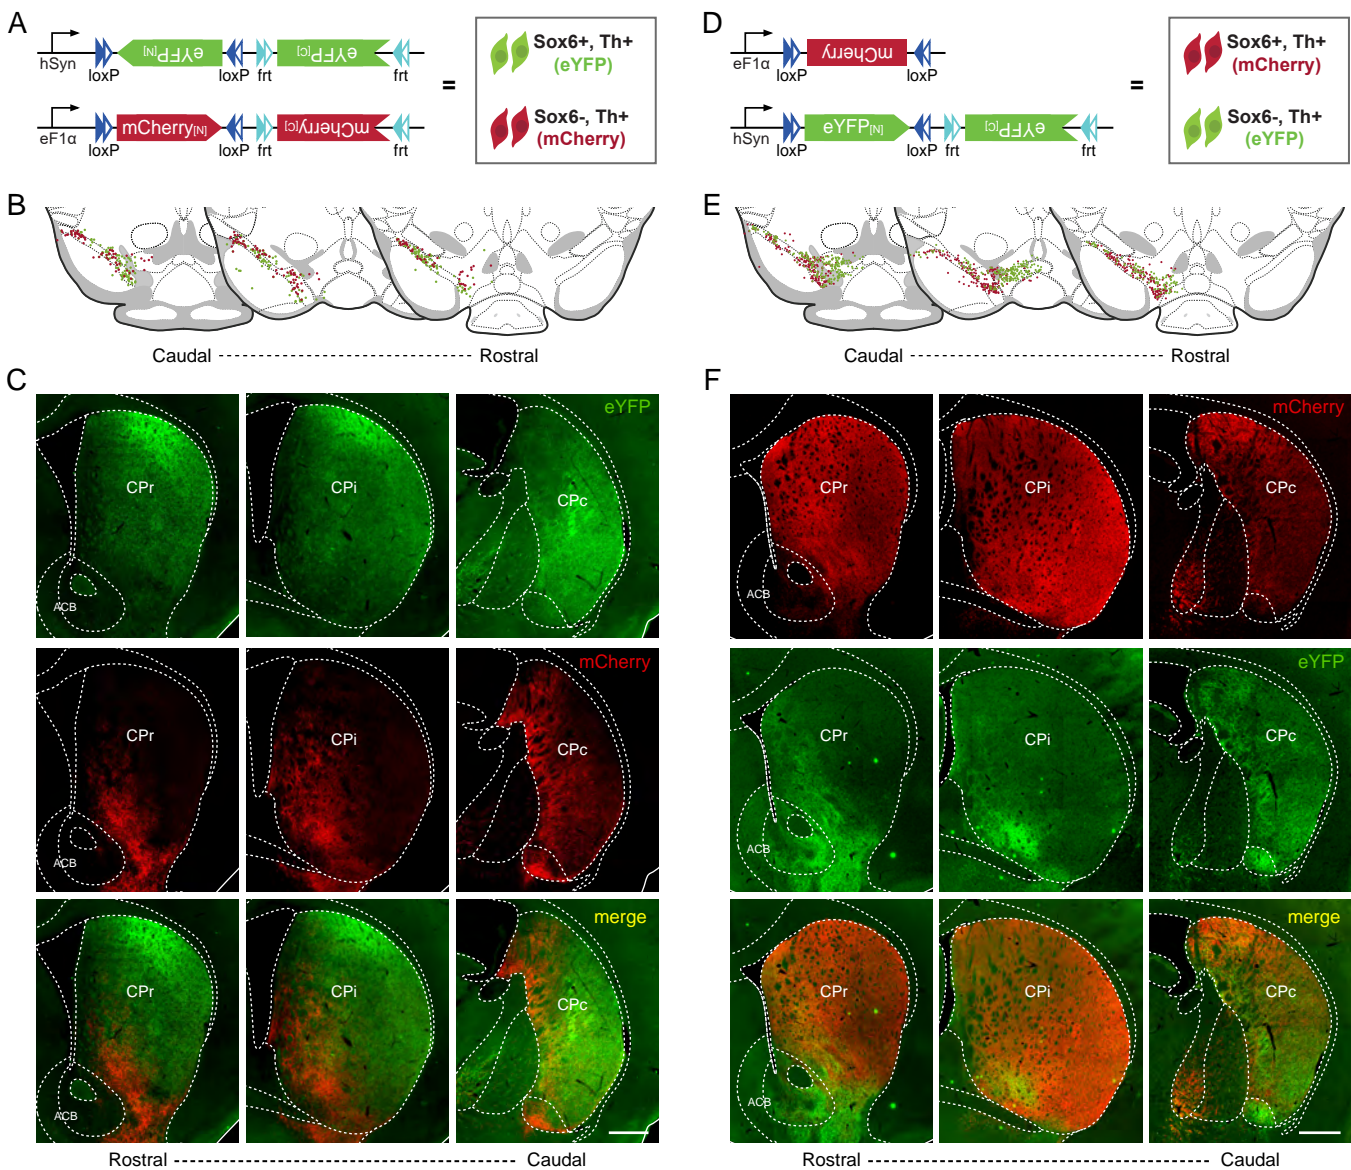

**Fig. S5 (Related to Figure 4): Sox6<sup>+</sup> and Sox6<sup>-</sup> projection patterns are similar when only SNc neurons are labelled, and when an alternative viral strategy is used.**

**A)** Genetic strategy used to simultaneously label Sox6<sup>+</sup> and Sox6<sup>-</sup> neurons and their projections in adult brains, as in Fig. 4. **B)** Representation of labeled cells in the midbrain corresponding to panel A. Each dot represents 1 labeled cell. Few cells in VTA and less medial SNc cells are labeled, compared to Fig. 4. **C)** Projections across the rostro-caudal axis of the striatum from Th<sup>+</sup>Sox6<sup>+</sup> dSNc neurons (eYFP, top), from Th<sup>+</sup>Sox6<sup>-</sup> vSNc neurons (mCherry, middle), and merged images (bottom), from cells shown in Fig. 5SB. Scale bar 500 μm. **D)** Genetic strategy used to simultaneously label Sox6<sup>+</sup> and Sox6<sup>-</sup> neurons and their projections in adult brains. The viral strategy is opposite to Fig. 4 and Fig. S5A-C, with Sox6<sup>+</sup>Th<sup>+</sup> cells labeled by mCherry and Sox6<sup>-</sup>Th<sup>+</sup> cells labeled by eYFP. **E)** Representation of labeled cells in the midbrain corresponding to panel D. Each dot represents 1 labeled cell. **F)** Projections across the rostro-caudal axis of the striatum from Th<sup>+</sup>Sox6<sup>+</sup> dSNc neurons (mCherry, top), from Th<sup>+</sup>Sox6<sup>-</sup> vSNc neurons (eYFP, middle), and merged images (bottom), from cells shown in Fig. 5SE. Scale bar 500 μm.

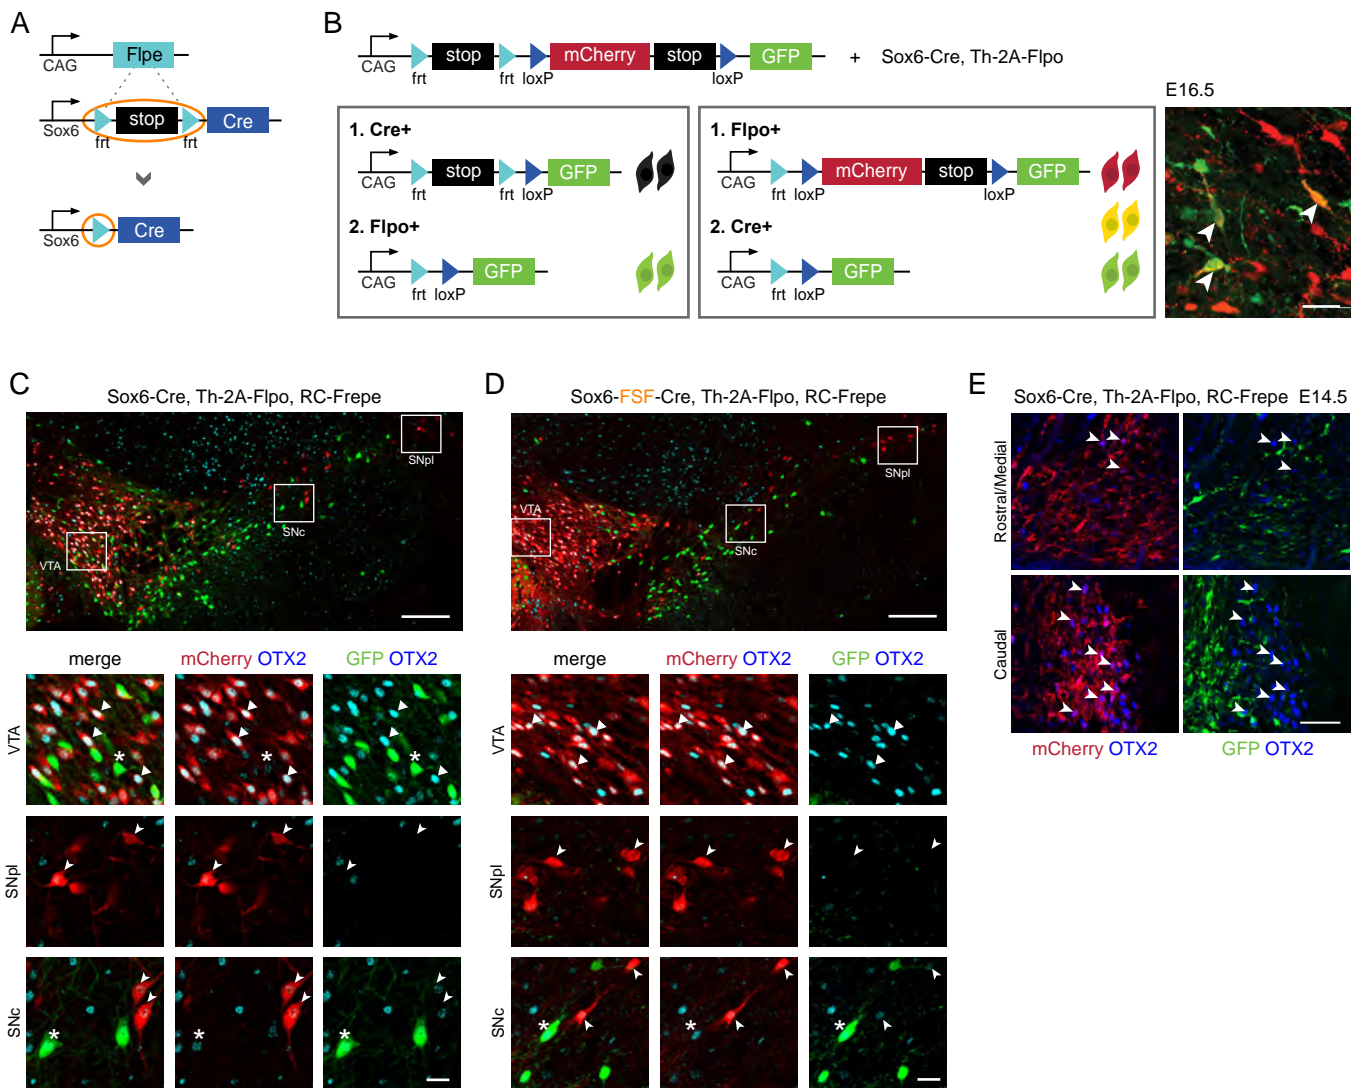

**Figure S6 (Related to Figure 5): Sox6 cumulative fate map characterization**

**A**) When Sox6-FSF-Cre is crossed to CAG-Flpo, the *frt*-flanked stop cassette is deleted to obtain a Sox6-Cre line. **B**) Possible sequence of recombination events in Sox6-Cre, Th-2A-Flpo, RC-Frepe brains (all heterozygous). Left: Cell-labeling outcome if Cre expression precedes Flpo. 1. Cre expression alone does not induce fluorescence. 2. Upon subsequent Flpo expression, cells will express GFP. Middle: Cell-labeling outcome if Flpo expression precedes Cre. 1. Flpo expression induces mCherry. 2. Subsequent Cre expression in mCherry<sup>+</sup> cells induces expression of GFP. In this scenario, cells express mCherry<sup>+</sup> and GFP<sup>+</sup> until mCherry is degraded and then cell expresses only GFP. Right: example of mCherry, GFP double-positive cells in E16.5 Sox6-Cre, Th-2A-Flpo, RC-Frepe brains (arrowheads, n=3). **C-D**) Comparison of OTX2 expression in Sox6-Cre vs Sox6-FSF-Cre with Th-2A-Flpo, RC-Frepe. Few GFP<sup>+</sup>OTX2<sup>+</sup> are observed in the VTA of Sox6-FSF-Cre brains (D), some GFP<sup>+</sup> cells have detectable OTX2 signal in Sox6-Cre brains (C, asterisks). In both fate maps, mCherry<sup>+</sup> cells in the VTA express robust OTX2 (triangles); mCherry<sup>+</sup> in the dorsal SNc and SNpl have weak/residual OTX2 signal (arrowheads). In the SNc, GFP<sup>+</sup> cells have weak/residual OTX2 signal (asterisk) (n=3, each). **E**) Sox6-Cre, Th-2A-Flpo, RC-Frepe at E14.5. Rostrally, there are few faint OTX2<sup>+</sup> cells colocalizing mainly with mCherry (arrowheads). In caudal sections, there are visibly more and higher signal OTX2<sup>+</sup> cells that co-express mCherry (arrowheads) (n=2). Scale bars: C, D: 200  $\mu$ m (low magnification) and 25  $\mu$ m (crops), B, E: 50  $\mu$ m. VTA: ventral tegmental area, SNpl: substantia nigra pars lateralis, SNc: substantia nigra pars compacta.

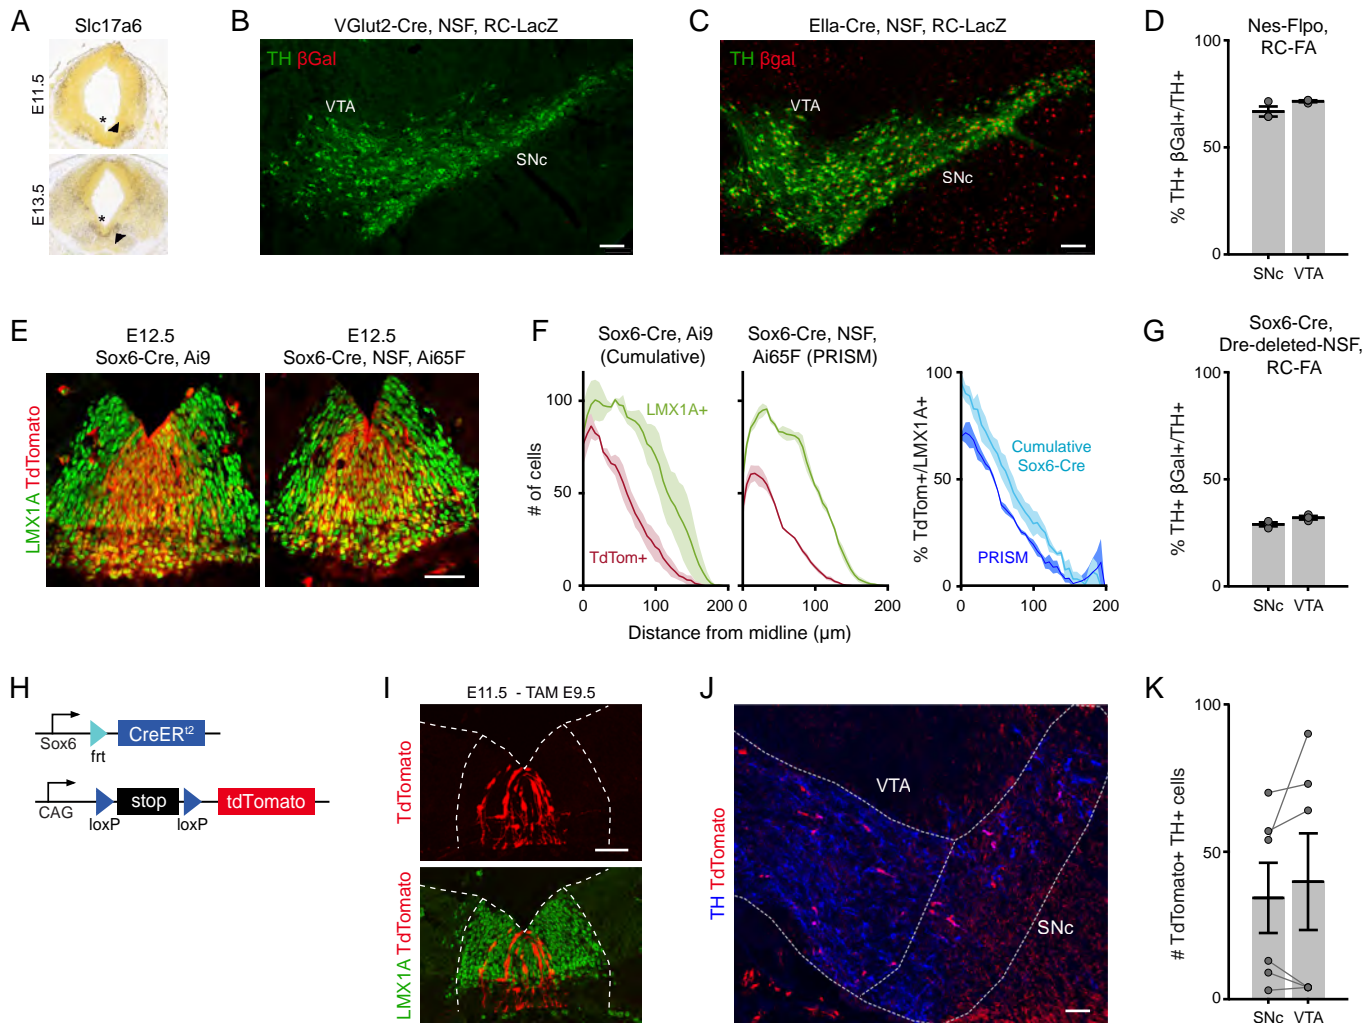

**Fig. S7 (Related to Figure 6): PRISM efficiency and validation of results with a genetically induced fate map**

**A)** Allen Atlas coronal sections of embryonic brains showing Slc17a6 (*Vglut2*) in nascent post-mitotic neurons (arrowheads) and lack thereof in the ventricular zone (asterisk). **B)** No  $\beta$ Gal<sup>+</sup> cells are observed in Vglut2-Cre, Nestin-LSL-Flopo (NSF), RC-LacZ adult brains, proving that PRISM does not label post-mitotic neurons (n=3). **C)** Immunolabeling for TH (green) and  $\beta$ Gal (red) on Ella-Cre, Nes-LSL-Flopo, RC-LacZ brains show  $\beta$ Gal<sup>+</sup> cells widely expressed in the SNc and VTA (n=3). **D)** Maximum recombination potential of PRISM determined in Nestin-Flopo (obtained by germline deletion of loxP-flanked STOP cassette), RC-LacZ brains (n=3). **E)** Sox6-Cre, Ai9 and Sox6-Cre, Nestin-LSL-Flopo, Ai65F embryonic floor plate at E12.5. Sox6<sup>+</sup> progenitors (tdTomato<sup>+</sup>) are mainly medially located. **F)** Spatial distribution of Sox6<sup>+</sup> cells in the embryonic floor plate (left) and percentage of LMX1A<sup>+</sup> cells that express tdTomato<sup>+</sup> in Sox6 vs PRISM fate maps (right). All tdTomato<sup>+</sup> counted were also LMX1A<sup>+</sup> (n=3). **G)** Quantification of TH<sup>+</sup>, $\beta$ Gal<sup>+</sup>/TH<sup>+</sup> when the d4GFP cassette is germline deleted in Nestin-LSL-Flopo with a Dre-deleter (n=3). **H)** Genetically induced fate map breeding strategy. **I)** In TAM injected E9.5  $\rightarrow$  E11.5 harvested brains, tdTomato<sup>+</sup> progenitors (Sox6<sup>+</sup>) are located medially in the *Lmx1a*<sup>+</sup> floor plate (n=3). **J)** TAM injected E9.5 $\rightarrow$ P0 harvested brains stained for TH and tdTomato (n=6). **K)** Average number of tdTomato<sup>+</sup>,TH<sup>+</sup> cells in the SNc and VTA of Sox6-CreERT2, Ai9 P0 brains (TAM at E9.5). tdTomato<sup>+</sup> cells (derived from Sox6<sup>+</sup> progenitors) are observed in the SNc and VTA. Scale bars: B, C: 100  $\mu$ m, all other scale bars 50  $\mu$ m. Error bars (D, G, K) and shaded areas (F) are SEM. NSF: Nestin-LSL-Flopo, SNc: substantia nigra pars compacta, VTA: ventral tegmental area.



| Control Cases |           |     |                                                            |                        | PD Cases |           |     |                                                          |                        |             |                        |
|---------------|-----------|-----|------------------------------------------------------------|------------------------|----------|-----------|-----|----------------------------------------------------------|------------------------|-------------|------------------------|
| Case          | Age (yrs) | Sex | Cause of death                                             | Post-mortem delay (hs) | Case     | Age (yrs) | Sex | Cause of death                                           | Post-mortem delay (hs) | Braak stage | Disease duration (yrs) |
| 1             | 60        | F   | Ovarian cancer                                             | 13                     | 15       | 67        | M   | PD, MSA                                                  | 53                     | VI          | 8                      |
| 2             | 61        | F   | Ovarian cancer                                             | 15                     | 16       | 70        | F   | Ischemic heart disease, PD                               | 34                     | VI          | 15                     |
| 3             | 67        | F   | Metastatic ovarian cancer                                  | 32                     | 17       | 72        | F   | Renal cancer                                             | 17                     | VI          | 10                     |
| 4             | 70        | F   | Sepsis, Stage IV peritoneal cancer, ischemic heart disease | 45                     | 18       | 72        | M   | Unknown                                                  | 46                     | VI          | 26                     |
| 5             | 73        | F   | Chronic obstructive pulmonary disease                      | 30                     | 19       | 74        | M   | Unknown                                                  | 52                     | VI          | 14                     |
| 6             | 74        | F   | Unknown                                                    | 29                     | 20       | 75        | M   | Bronchial pneumonia                                      | 26                     | VI          | 11                     |
| 7             | 78        | F   | Myeloid leukaemia                                          | 33                     | 21       | 76        | F   | Unknown                                                  | 19                     | VI          | 24                     |
| 8             | 83        | F   | Hyperglycemia                                              | 49                     | 22       | 79        | F   | Congestive cardiac failure, PD                           | 41                     | VI          | 10                     |
| 9             | 84        | M   | Bladder cancer, pneumonia                                  | 23                     | 23       | 79        | M   | Aspiration pneumonia secondary to advanced PD            | 8                      | V           | 13                     |
| 10            | 84        | M   | Cardiac asthenia amyloid                                   | 34                     | 24       | 82        | F   | PD, senile dementia                                      | 40                     | VI          | 14                     |
| 11            | 85        | M   | Unknown                                                    | 12                     | 25       | 82        | M   | Ischemic and degenerative heart disease, carcinoma liver | 30                     | VI          | 11                     |
| 12            | 89        | F   | Unknown                                                    | 22                     | 26       | 83        | F   | Unknown                                                  | 17                     | VI          | 19                     |
| 13            | 90        | M   | Respiratory failure secondary to bronchial cancer          | 12                     | 27       | 86        | F   | End stage PD                                             | 48                     | VI          | 8                      |
| 14            | 91        | F   | Unknown                                                    | 19                     | 28       | 88        | F   | Ischemic heart disease                                   | 24                     | VI          | 21                     |
|               |           |     |                                                            |                        | 29       | 92        | F   | Unknown                                                  | 63                     | VI          | 19                     |

**Supplementary Table I (related to Figure 1): Human control and Parkinson's disease cases in this study.**

Age in years, sex, cause of death/additional diagnosis, post-mortem time elapsed before tissue samples were collected (PMD), Braak stage of PD, and disease duration in years of 14 control and 15 PD patients.
